# Supplementary figures and images for: Genomic Characterization of the Istrian Shorthaired Hound
Source: MDPI journal article supplement (doi:10.3390/ani10112013), 2020-11-01

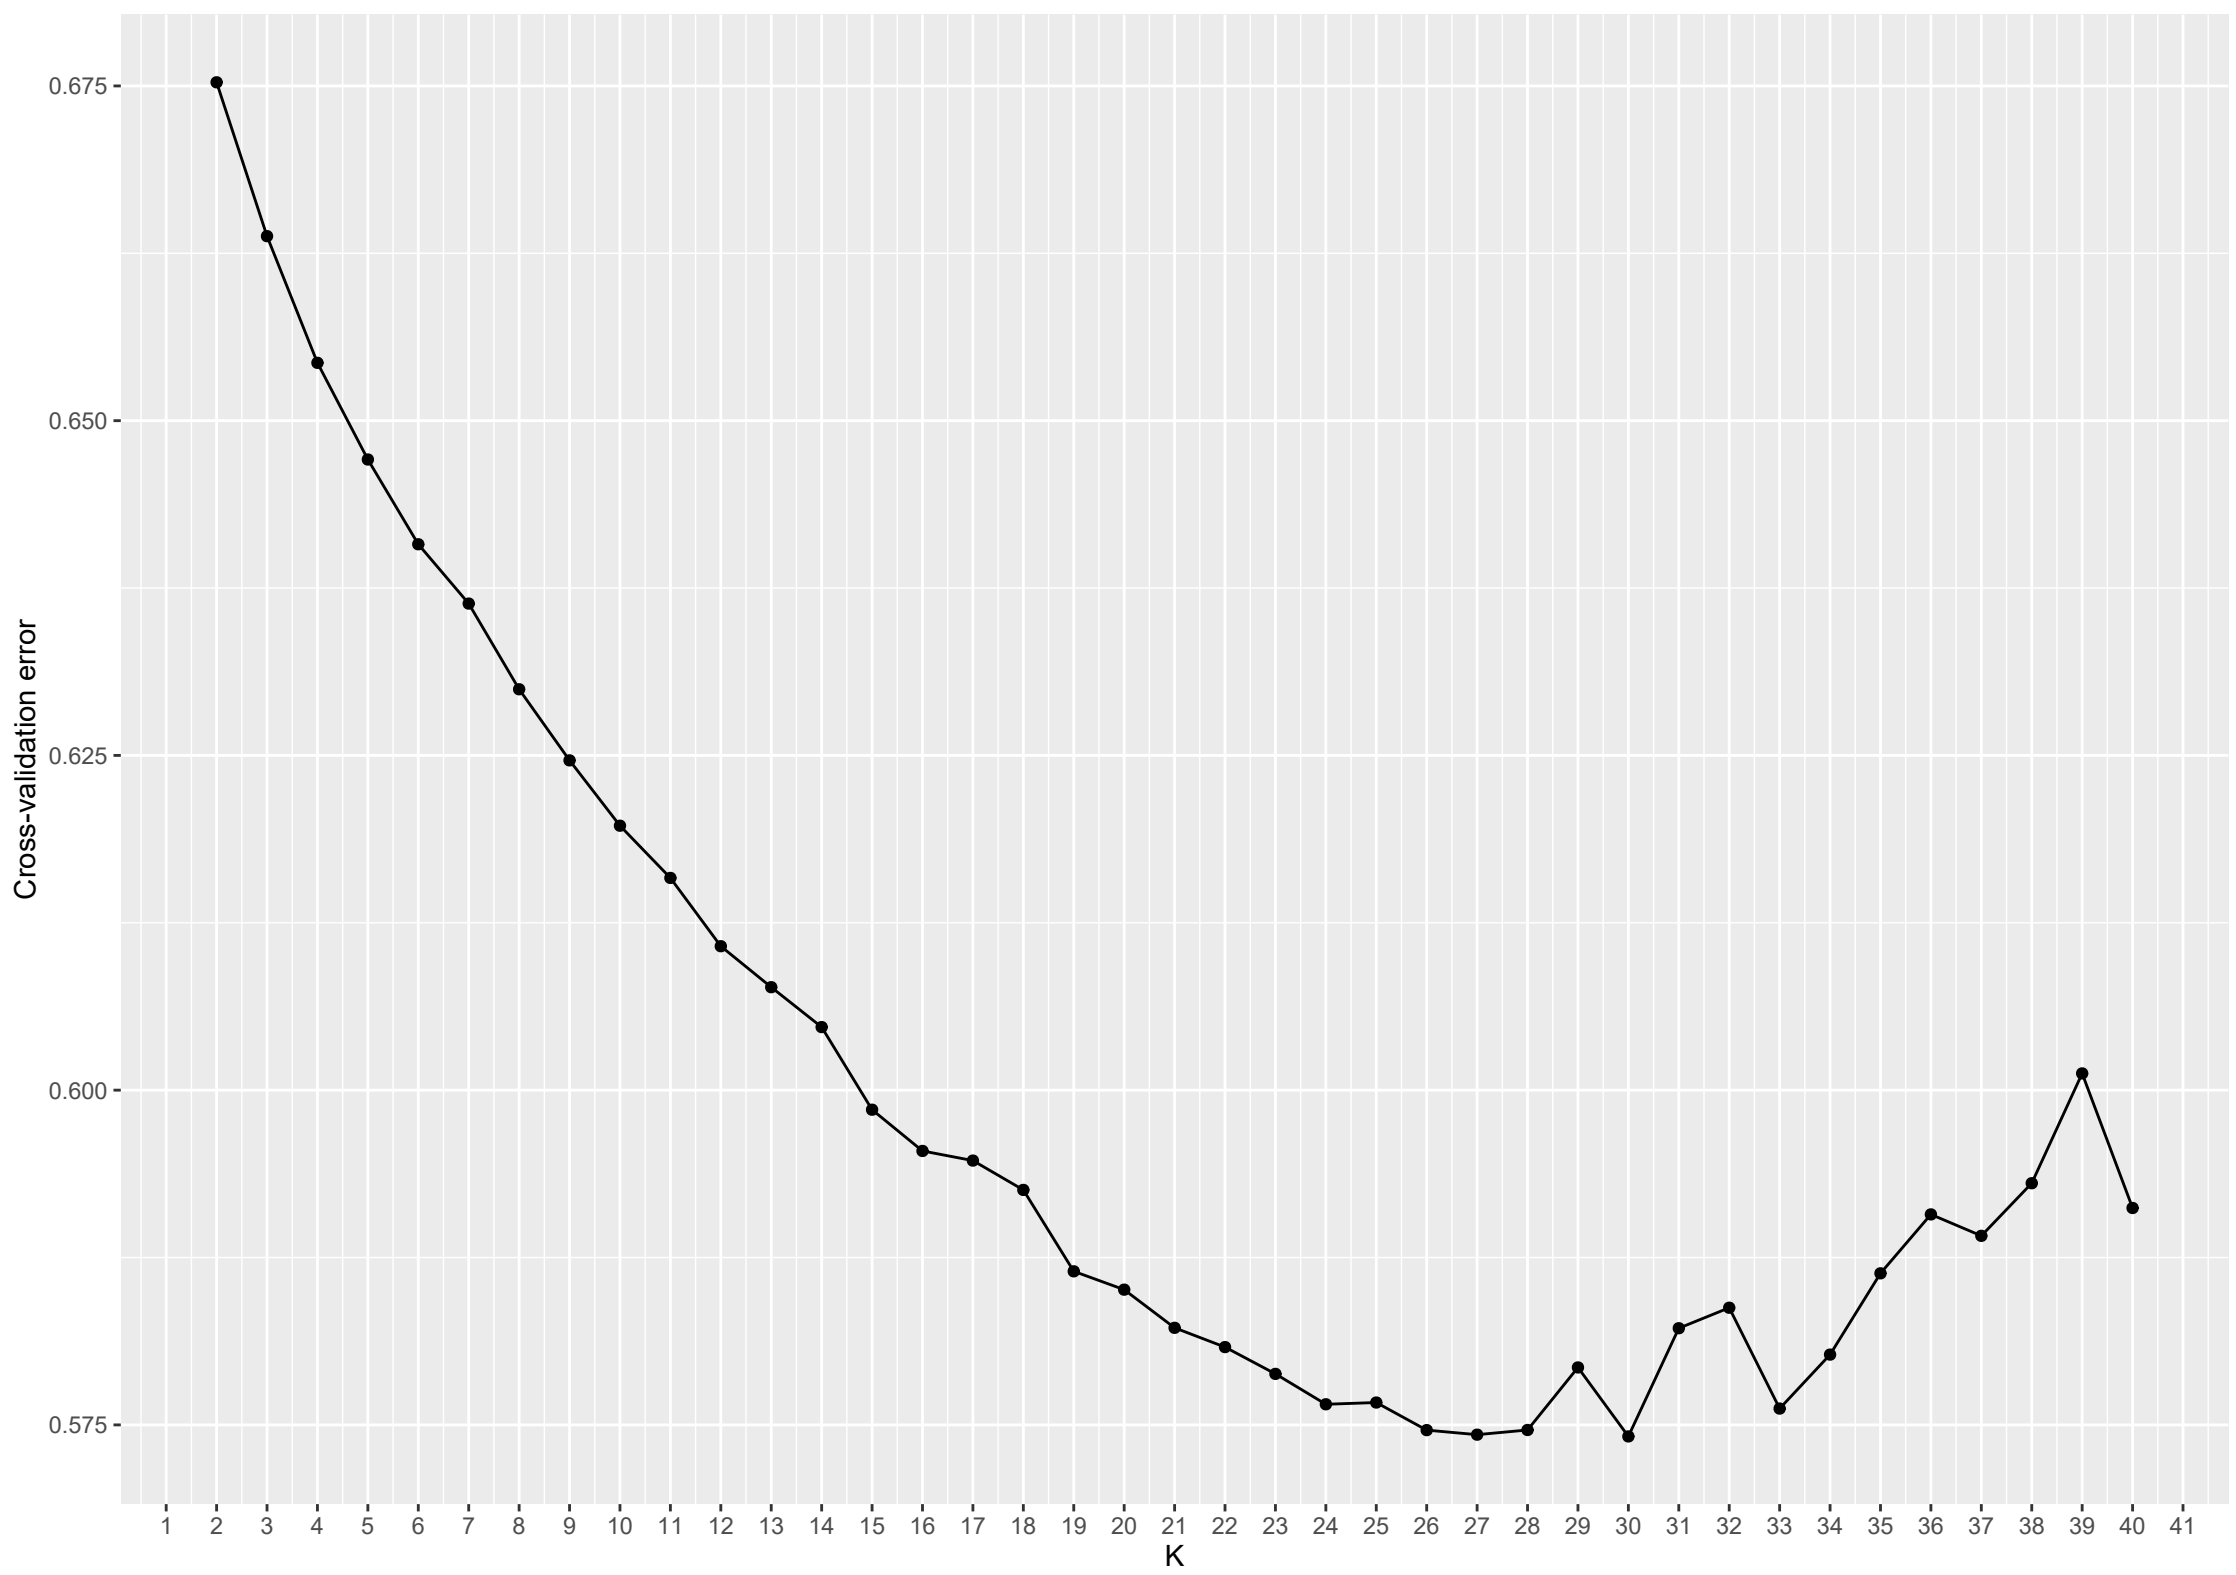

Supplement: s1 [file s1]
